# Supplementary material for: Usability of a novel lateral flow assay for the point-of-care detection of Neisseria gonorrhoeae: A qualitative time-series assessment among healthcare workers in South Africa
Source: PubMed Central journal article supplement (PMC10237465; doi:10.1371/journal.pone.0286666), 2023-06-02

File S2. Study participation across time series: SUS surveys and IDIs

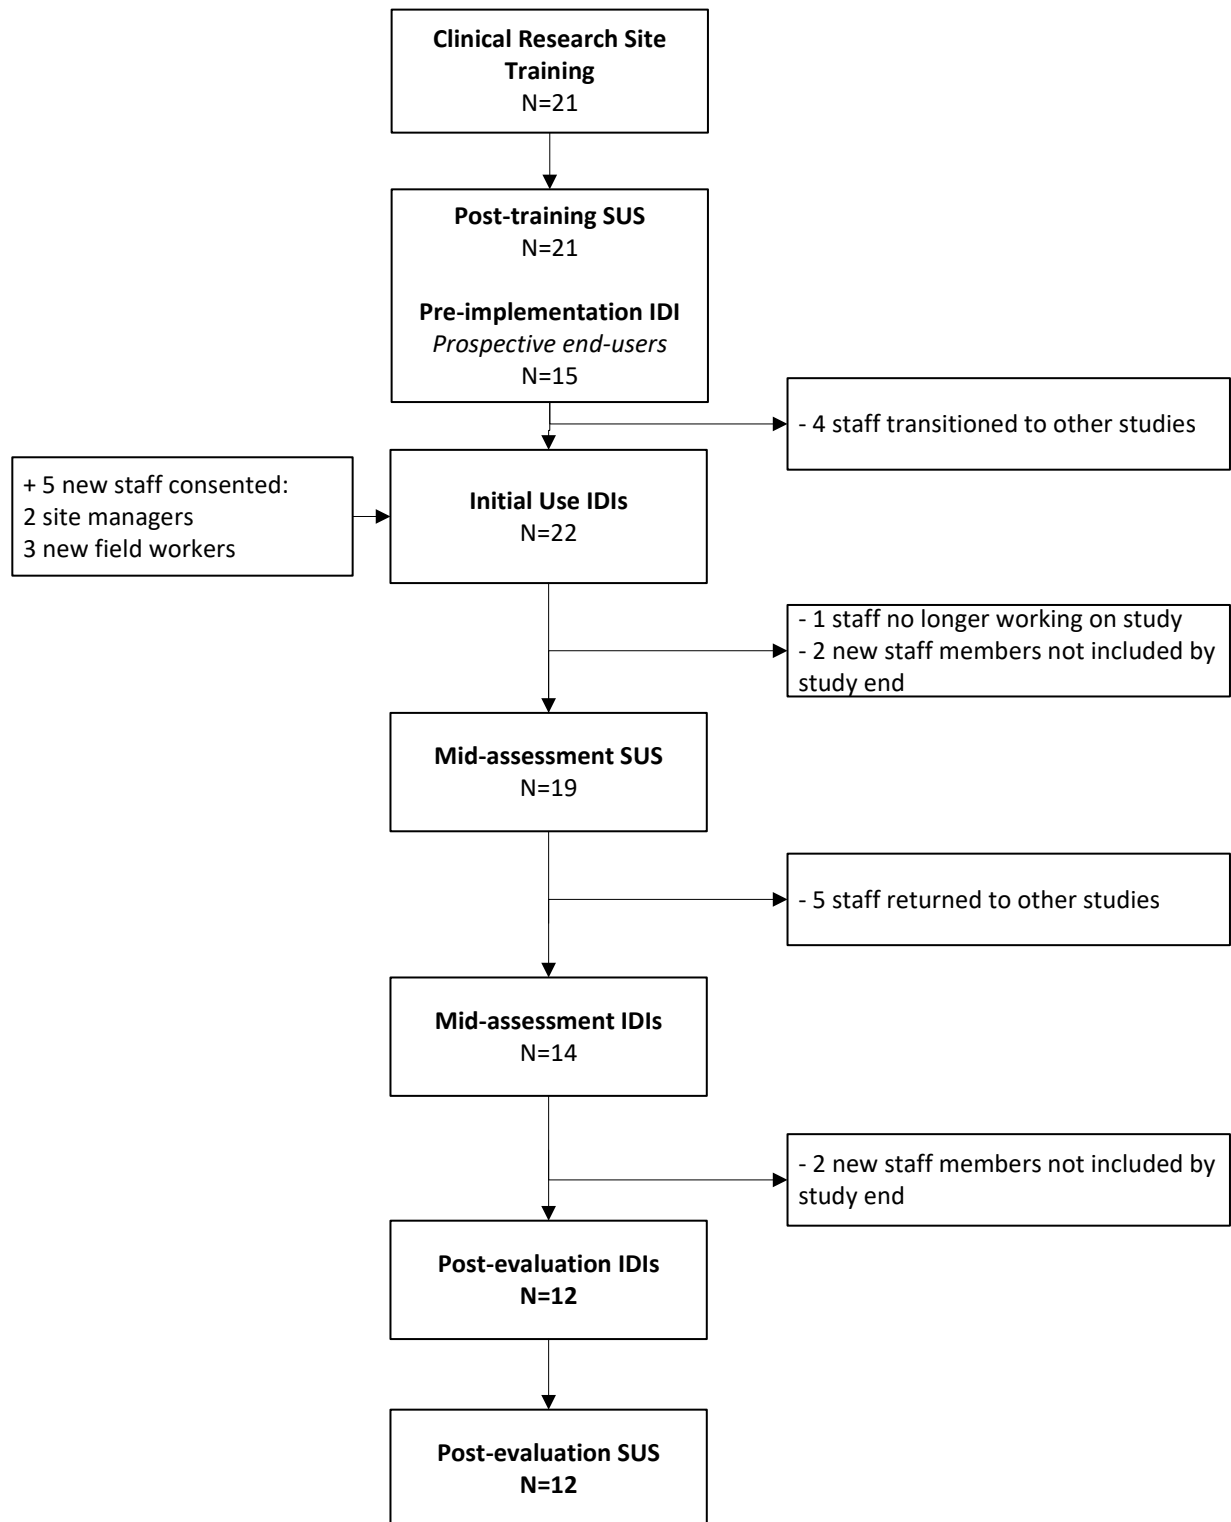

Supplement: pone.0286666.s002.pdf [file pone.0286666.s002.pdf]
